# Supplementary material for: High-precision 41K/39K measurements by MC-ICP-MS indicate terrestrial variability of δ41K
Source: Royal Society of Chemistry journal article supplement (doi:10.1039/c7ja00257b), 2017-11-02
Supplement: c7ja00257b1.xlsx [file c7ja00257b1.xlsx]

## Sheet: Table S1
Run ID	d41K	± 2	N	SE		Category	Label	Source	Phase	Notes	Digestion Protocol and Location
Pegmatites
JF89_12_C	-1.36	0.34	2	0.12		Pegmatite	Lepidolite, Glenbuchat	Pegmatite (Lepidolite)	Mineral	late lepidolite-albite-quartz rock in fractionated lithium pegmatite cutting gabbro, Peatfold, Glenbuchat, Aberdeenshire, Scotland. Caledonian.	Hot plate digestion at SUERC
JF89_12B	-1.31	0.1	2	0.03		Pegmatite	Muscovite, Glenbuchat	Pegmatite (Muscovite)	Mineral	dark blue tourmaline-albite-muscovite-quartz rock, lithium pegmatite cutting gabbro, Peatfold, Glenbuchat, Aberdeenshire, Scotland. Caledonian.	Hot plate digestion at SUERC
M11650	-1.19	0.08	2	0.03		Pegmatite	Amazonite Pikes Peak	Pegmatite (Amazonite)	Mineral	base of crystal from drusy cavity in A-type granite, Pikes Peak Batholith, Proterozoic	Hot plate digestion at SUERC
M11650.5	-1.15	0.17	1	na		Pegmatite	Amazonite Pikes Peak	Pegmatite (Amazonite)	Mineral	side of crystal from drusy cavity in A-type granite, Pikes Peak Batholith, Proterozoic	Hot plate digestion at SUERC
M11650.4	-1.06	0.22	2	0.08		Pegmatite	Amazonite Pikes Peak	Pegmatite (Amazonite)	Mineral	side of crystal from drusy cavity in A-type granite, Pikes Peak Batholith, Proterozoic	Hot plate digestion at SUERC
M11650.3	-1.04	0.14	2	0.05		Pegmatite	Amazonite Pikes Peak	Pegmatite (Amazonite)	Mineral	side of crystal from drusy cavity in A-type granite, Pikes Peak Batholith, Proterozoic	Hot plate digestion at SUERC
M11650.1	-0.91	0.12	2	0.04		Pegmatite	Amazonite Pikes Peak	Pegmatite (Amazonite)	Mineral	side of crystal from drusy cavity in A-type granite, Pikes Peak Batholith, Proterozoic	Hot plate digestion at SUERC
M11650.2	-0.89	0.14	2	0.05		Pegmatite	Amazonite Pikes Peak	Pegmatite (Amazonite)	Mineral	side of crystal from drusy cavity in A-type granite, Pikes Peak Batholith, Proterozoic	Hot plate digestion at SUERC
JF89.12A ms	-0.79	0	2	0		Pegmatite	Muscovite, Glenbuchat	Pegmatite (Muscovite)	Mineral	late coarse mica in non-drusy muscovite-schorl-quartz-Kfsp pegmatite cutting gabbro, Peatfold, Glenbuchat, Scotland (Silurian-Devonian)	Hot plate digestion at SUERC
45825	-0.71	0.17	1	na		Pegmatite	Astrophyllite, Eikaholmen	Pegmatite (Astrophyllite)	Mineral	mildly agpaitic syenite pegmatite, Eikaholmen, Langesundfjord, Norway Carboniferous-Permian	Hot plate digestion at SUERC
JF89_12_A_kfs	-0.65	0.14	2	0.05		Pegmatite	K-Feldspar, Glenbuchat	Pegmatite (K-feldspar)	Mineral	early graphic intergrowth with quartz, non-drusy muscovite-schorl-quartz-Kfsp pegmatite, Glenbuchat, Scotland (Silurian-Devonian)	Hot plate digestion at SUERC
134314	-0.55	0.12	2	0.04		Pegmatite	K-Feldspar, Kymi	Pegmatite (K-feldspar)	Mineral	simple pegmatite in F-rich granite, Kymi, Finland. Proterozoic.	Hot plate digestion at SUERC
134829	-0.47	0.17	1	na		Pegmatite	Polylithionite, Ilimaussaq	Pegmatite (Polylithionite)	Mineral	agpaitic eudialyte-aeg-microcline-rinkite-ne pegmatite in naujites, Kangerdluarsuk, Ilimaussaq, Greenland. Proterozoic.	Hot plate digestion at SUERC
134179_kfs	-0.42	0.17	1	na		Pegmatite	K-Feldspar, Sletteval	Pegmatite (K-feldspar)	Mineral	non-drusy 20m thick simple pegmatite sheet, Sletteval, South Harris, Scotland. Laxfordian (Proterozoic)?	Hot plate digestion at SUERC
111820	-0.32	0.1	4	0.02		Pegmatite	K-Feldspar, Broken Hill	Pegmatite (K-feldspar)	Mineral	pegmatite pod in sillimanite-biotite-garnet schist, Zinc Corporation Mine, Broken Hill, New South Wales, Australia	Hot plate digestion at SUERC
134179_bt	-0.28	0.17	1	na		Pegmatite	Biotite, Sletteval	Pegmatite (Biotite)	Mineral	non-drusy 20m thick simple pegmatite sheet, Sletteval, South Harris, Scotland. Laxfordian (Proterozoic)?	Hot plate digestion at SUERC
MOZ1 lepidolite	-0.11	0.17	1	na		Pegmatite	Lepidolite, Mozambique	Pegmatite (Lepidolite)	Mineral	late albite-lepidolite rock in extremely evolved lithium pegmatite, Morrua, Alto Ligonha, Mozambique. Pan-African (Proterozoic-Cambrian)	Hot plate digestion at SUERC
Igneous
GA1550.1	-0.77	0.12	5	0.03		Silicate	Biotite, Mt. Dromedary	Igneous	Mineral	biotite from Mt. Dromedary shallow intrusive, Australia	Hot plate digestion at SUERC
148555KFS	-0.71	0.14	3	0.04		Silicate	Orthoclase, Cornwall granite	Igneous	Mineral	Large white phenocryst in grey biotite-muscovite granite, Tregarden Quarry, St. Austell, Cornwall. Permian.	Hot plate digestion at SUERC
HUG_706-R12	-0.7	0.06	2	0.03		Silicate	Biotite, Rangwa Kenya	Igneous	Mineral	biotite-melilite rock (uncompahgrite), Rangwa, Lake Victoria, Kenya. Oligocene-Miocene.	Hot plate digestion at SUERC
MD2	-0.69	0.02	2	0.01		Silicate	Biotite, Mt. Dromedary	Igneous	Mineral	biotite from Mt. Dromedary shallow intrusive, Australia, sample from David Phillips, Uni. Melbourne	Hot plate digestion at SUERC
R492	-0.67	0.17	1	na		Silicate	Biotite, Alno Sweden	Igneous	Mineral	carbonatite dikelets in alkaline /carbonatite complex, Alno, Sweden, Late Proterozoic.	Hot plate digestion at SUERC
USGS QLO-1**	-0.58	0.14	4	0.07		Silicate	Quartz latite USGS QLO-1	Igneous	Whole rock	USGS Whole Rock powdered standard QLO-1	Microwave (MARS) digestion at Princeton
R489	-0.57	0.08	2	0.03		Silicate	Biotite-Phlogopite, Alno Sweden	Igneous	Mineral	megacryst/phenocryst in alnoite with crustal gneiss xenoliths, Alno, Sweden.	Hot plate digestion at SUERC
USGS AGV-2**	-0.56	0.1	5	0.02		Silicate	Andesite USGS AGV-2	Igneous	Whole rock	USGS Whole Rock powdered standard AGV-2	Microwave (MARS) digestion at Princeton
R23649**	-0.56	0.02	2	0		Silicate	Basalt, 1973 flow, Heimay Iceland	Igneous	Whole rock	Hawaiite-mugearite; 1973 flow, collected from 35 m below sea-level, Heimay, Iceland	Hot plate digestion at SUERC
USGS W-2a**	-0.55	0.214	2	0.076		Silicate	Centreville Diabase USGS W-2a	Igneous	Whole rock	USGS Whole Rock powdered standard W-2a	Microwave (MARS) digestion at Princeton
USGS BCR-2**	-0.55	0.12	4	0.03		Silicate	Basalt USGS BCR-2	Igneous	Whole rock	USGS Whole Rock powdered standard	Microwave (MARS) digestion at Princeton
R24007**	-0.55	0.14	4	0.03		Silicate	Obsidian, Ascension	Igneous	Whole rock (glass)	obsidian from Ascension Island, South Atlantic.	Hot plate digestion at SUERC
USGS BHVO-2**	-0.52	0.24	2	0.08		Silicate	Basalt USGS BHVO-2	Igneous	Whole rock	USGS Whole Rock powdered standard	Microwave (MARS) digestion at Princeton
FCS2	-0.51	0.16	2	0.06		Silicate	Sanidine, Fish Canyon Tuff	Igneous	Mineral	sanidine from Fish Canyon eruption of La Garita Caldera, San Juan volcanics, Colorado, USA. Oligocene.	Hot plate digestion at SUERC
134903	-0.51	0.17	1	na		Silicate	Biotite, Kilchatten Dike Scotland	Igneous	Mineral	deep megacryst in shallow-emplaced monchiquite dyke, Kilchatten, Colonsay Scotland. Permian.	Hot plate digestion at SUERC
R11316	-0.51	0.17	1	na		Silicate	Kalsilite, Alban Hills Rome	Igneous	Mineral	kalsilite crystals, intergrown with melilite crystals lining cavities in phlogopite-melilite- rock, Colle Cimino, Alban Hills, Rome, Italy. Block in leucitite "welded Scoriae". Pleistocene.	Hot plate digestion at SUERC
BR11-4 #2	-0.5	0.16	5	0.08		Silicate	Sanidine, Bishop Tuff	Igneous	Mineral	sanidine from Bishop Tuff eruption of Long Valley Caldera, Eastern Sierra, California, USA. Pleistocene. Sample from Paul Renne, Berkeley Geochronology Center.	Hot plate digestion at SUERC
FC bt	-0.5	0.04	2	0.02		Silicate	Biotite, Fish Canyon Tuff	Igneous	Mineral	biotite from Fish Canyon eruption of La Garita Caldera, San Juan volcanics, Colorado, USA. Oligocene.	Hot plate digestion at SUERC
148409	-0.5	0.17	1	na		Silicate	Phlogopite, Finero Lherzolite	Igneous	Mineral	lherzolite, Finero Peridotite, Italy	Hot plate digestion at SUERC
USGS GSP-2**	-0.48	0.1	3	0.03		Silicate	Granodiorite USGS GSP-2	Igneous	Whole rock	USGS Whole Rock powdered standard GSP-2	Microwave (MARS) digestion at Princeton
ACS V2	-0.46	0.1	3	0.03		Silicate	Sanidine, Alder Creek Tuff	Igneous	Mineral	rhyolite, Alder Creek, California. Pleistocene.	Hot plate digestion at SUERC
BR11-3	-0.44	0.14	2	0.05		Silicate	Sanidine, Bishop Tuff	Igneous	Mineral	sanidine from Bishop Tuff eruption of Long Valley Caldera, Eastern Sierra, California, USA. Pleistocene. Sample from Paul Renne, Berkeley Geochronology Center.	Hot plate digestion at SUERC
FC hb	-0.44	0.17	1	na		Silicate	Hornblende, Fish Canyon Tuff	Igneous	Mineral	hornblende from Fish Canyon eruption of La Garita Caldera, San Juan volcanics, Colorado, USA. Oligocene.	Hot plate digestion at SUERC
R23757	-0.44	0.17	1	na		Silicate	Phlogopite, Siilinjarvi Finland	Igneous	Mineral	apatite-phlogopite-zircon carbonatite, Siilinjarvi, Savo, Finland. Late Archaean.	Hot plate digestion at SUERC
CARB WT	-0.43	0.12	4	0.03		Carbonatite	Carbonatite straw formations	Magmatic – mantle	Carbonate	natrocarbonatite, Ol Doinyo Lengai, sample from Dan Barfod, SUERC.	Hot plate digestion at SUERC
HUG709-K50	-0.4	0.18	1	0.09		Silicate	Anorthoclase, Mount Kenya	Igneous	Mineral	glassy phenocryst in “rhomb porphyry”, upper reaches of Ontolili Valley, Mount Kenya.	Hot plate digestion at SUERC
M11625 BIOTITE	-0.18	0.17	1	na		Silicate	Biotite, Alban Hills Rome	Igneous	Mineral	mass of biotite and nepheline crystals, Marino, Alban Hills, Rome, Italy. Pleistocene.	Hot plate digestion at SUERC
M11325 NEPH (M11625)	-0.01	0.17	1	na		Silicate	Nepheline, Alban Hills Rome	Igneous	Mineral	mass of biotite and nepheline crystals, Marino, Alban Hills, Rome, Italy. Pleistocene.	Hot plate digestion at SUERC
R11315	1.21	0.26	5	0.06		Silicate	Kaliophilite, Alban Hills Rome	Igneous	Mineral	elongate crystals, Colle Cimino, Alban Hills, Rome, Italy. Block in leucitite "welded Scoriae". Pleistocene	Hot plate digestion at SUERC
Metamorphic
Cww	-0.899	0.04	2	0.01		Silicate	Impact melt, Clearwater West	Impact melt	Whole rock	whole rock from Clearwater West Imact Structure, Canada, sample from Thijs van Soest, Arizona State Uni.	Hot plate digestion at SUERC
Roch	-0.713	0.17	1	na		Silicate	Impact melt, Rochechouart	Impact melt	Whole rock	whole rock from Rochechouart impact crater, France, sample from Thijs van Soest, Arizona State Uni.	Hot plate digestion at SUERC
USGS SDC-1	-0.66	0.14	2	0.05		Silicate	Mica schist USGS SDC-1	Metamorphic	Whole rock	USGS Whole Rock powdered standard SDC-1	Microwave (MARS) digestion at Princeton
148508_MELT	-0.53	0.22	3	0.07		Silicate	Pseudotachylite melt rock, South Uist	Metamorphic	Whole rock	tonalitic gneiss cut by later pseudotachylite veins, Rubha Aird a' Mhuile, Bornish, South Uist, Scotland, Archaean	Hot plate digestion at SUERC
148508_HR	-0.5	0.22	2	0.08		Silicate	Pseudotachylite, host rock, South Uist	Metamorphic	Whole rock	tonalitic gneiss cut by later pseudotachylite veins, Rubha Aird a' Mhuile, Bornish, South Uist, Scotland, Archaean	Hot plate digestion at SUERC
111760	-0.45	0.12	2	0.04		Silicate	Phengite, Syros	Metamorphic	Mineral	phengite from glaucophane-phengite-calcite-garnet schist, impure marble, Delfini Bay, Syros, Greece. Eocene?	Hot plate digestion at SUERC
148184	-0.3	0.12	2	0.04		Silicate	Phengite, garnet eclogite, Norway	Metamorphic	Mineral	eclogite w/ garnet, omphacite, phengite, kyanite, clinozoisite, rutile, and qtz. after coesite.	Hot plate digestion at SUERC
111087	-0.23	0.06	2	0.02		Silicate	Muscovite, Laytonville	Metamorphic - hydrothermal	Mineral	musc., chromian, ('fuchsite') in deformed and altered glaucophone schist, 100 yards from Laytonville Quarry, CA (Franciscan)	Hot plate digestion at SUERC
100239	-0.21	0.06	3	0.01		Silicate	Neptunite, San Benito	Metamorphic - hydrothermal	Mineral	neptunite-benitoite-natrolite vein in glaucophane schist inclusion in serpentinite, San Benito Co, California, USA.	Hot plate digestion at SUERC
Siliciclastic
USGS SBC-1	-0.61	0.12	5	0.03		Silicate	Brush Creek Shale USGS SBC-1	sedimentary silicate	Whole rock	USGS Whole Rock powdered standard SBC-1	Microwave (MARS) digestion at Princeton
USGS SGR-1	-0.25	0.08	4	0.02		Silicate	Green River Shale USGS SGR-1	sedimentary silicate	Whole rock	USGS Whole Rock powdered standard SGR-1	Microwave (MARS) digestion at Princeton
Evaporites
M8928	-0.24	0.17	1	na		Evaporite	Kainite, Stassfurt	Evaporite - marine	Mineral	pure material, Stassfurt, Germany. Permian.	Hot plate digestion at SUERC
M4084	-0.22	0.17	1	na		Evaporite	Polyhalite, Upper Austria	Evaporite - marine	Mineral	fibrous polyhalite from Upper Austria, probably from the Haselgebirge melange, Permian-Triassic	Hot plate digestion at SUERC
M8789	-0.16	0.17	1	na		Evaporite	Carnallite, Stassfurt	Evaporite - marine	Mineral	pure material, Stassfurt, Germany. Permian.	Hot plate digestion at SUERC
HUG461A	-0.06	0.17	1	na		Evaporite	Sylvite vein in shale, Boulby Mine	Evaporite - marine	Mineral	vein in shale, overlying main potash bed, Boulby Mine, Yorkshire, England. Permian.	Hot plate digestion at SUERC
RAW	0.03	0.17	1	na		Fertilizer	Fertilizer, RAW	Fertilizer	Whole Rock		Ultrasonicated in ultrapure water
GRAY-31	0.08	0.17	1	na		Evaporite	Sylvite, Michigan	Evaporite - marine	Mineral	Late Silurian, Salina A-1	Hot plate digestion at SUERC
MaxiGro	0.12	0.17	1	na		Fertilizer	Fertilizer, MaxiGro	Fertilizer	Whole Rock		Ultrasonicated in ultrapure water
Hanksite 2	0.43	0.1	2	0.04		Evaporite	Hanksite, Searles Lake	Evaporite – lacustrine	Whole Rock	lacustrine evaporite, Searles Lake, USA	Hot plate digestion at SUERC
148554	0.64	0.02	3	0.01		Evaporite	Hartsalz A, Stassfurt	Evaporite – marine	Mineral	sylvite from banded Hartsalz (much altered evaporite assemblage), Stassfurt, Germany. Permian.	Hot plate digestion at SUERC
Hydrothermal
M3172	-0.69	0.17	1	na		Silicate	Phillipsite, Melbourne	Hydrothermal - continental	Silicate (zeolite)	hydrothermal vesicle lining in basalt, Melbourne, Australia (Lower- Mid Pleistocene)	Hot plate digestion at SUERC
M5980 alunite	-0.68	0.17	1	na		Sulfate	Alunite, Marysville Utah	Hydrothermal - continental	Sulfate	coarsely crystalline, pink veins/replacements in silicic volcanic rocks, Marysville, Utah. Tertiary	Hot plate digestion at SUERC
RS-01	-0.68	0.17	1	na		Sulfate	Jarosite, Alligator Ridge Nevada	Hydrothermal – Carlin type Au deposit	Sulfate	joints on Au-rich, silicified calcareous siltstone, Vantage No 2 Pit, Alligator Ridge, Nevada. Miocene.
M7954 adularia	-0.58	0.17	1	na		Silicate	Adularia, Graubunden Switzerland	Hydrothermal - continental	Silcate (feldspar)	late, low P veins in Alpine gneisses, Graubunden, Switzerland. Miocene.	Hot plate digestion at SUERC
134143 apophyllite, Skye	-0.56	0.17	1	na		Silicate	Apophyllite, Skye	Hydrothermal - continental	Silicate (phyllosilicate)	hydrothermal vesicle lining in basalt, Moonen Bay, Skye, Scotland. Palaeogene.	Hot plate digestion at SUERC
M5970	-0.54	0.22	1	0.11		Silicate	Apophyllite, Traprain Law Scotland	Hydrothermal - continental	Silicate (phyllosilicate)	late hydrothermal product in drusy cavity in phonolite laccolith, Traprain Law, Scotland. Carboniferous	Hot plate digestion at SUERC
M6335	-0.41	0.16	1	0.08		Silicate	Apophyllite, Deccan Traps India	Hydrothermal - continental	Silicate (phyllosilicate)	hydrothermal vesicle lining in basalt, Pune, Bombay, India. Deccan Traps Cretaceous-Palaeogene.	Hot plate digestion at SUERC
M8975 alunite	-0.4	0.17	1	na		Sulfate	Alunite, Buladelah Australia	Hydrothermal - continental	Sulfate	massive, fine-grained pink, in altered rhyolite, Buladelah, New South Wales, Australia. Tertiary?	Hot plate digestion at SUERC
Biological
Lamb	-0.88	0.04	2	0.01		Biology	Lamb	Meat	Muscle	purchased from butcher in Scotland
Beef	-0.47	0.08	2	0.03		Biology	Beef	Meat	Muscle	purchased from butcher in Scotland
Banana	-0.38	0.12	5	0.06		Biology	Banana	Produce	Fruit	purchased from grocery in Scotland
Prawn	-0.36	0.04	2	0.02		Biology	Prawn	Seafood	Muscle	purchased from fishmonger in Scotland
Haddock	-0.08	0.2	4	0.05		Biology	Haddock	Seafood	Muscle	purchased from fishmonger in Scotland
Potato	0.1	0.12	4	0.03		Biology	Potato	Produce	Tuber	purchased from grocery in Scotland
Scallop	0.36	0.06	3	0.02		Biology	Scallop	Seafood	Muscle	purchased from fishmonger in Scotland
Standards
SRM 70B	-0.68	0.18	33	0.01		Silicate	SRM 70B, feldspar	Igneous	Silicate (feldspar)	NIST, Custer feldspar district in the Black Hills of South Dakota
SRM 999b	-0.03	0.17	55	0.01		Standard KCl	SRM 999b, KCl	Evaporite - unknown source	Chloride	NIST
SRM 918*, ***	-0.03	0.22	26	0.02		Standard KCl	SRM 918, KCl	Evaporite - unknown source	Chloride	NIST
SRM 985*, ***	0.26	0.07	17	0.01		Standard KCl	SRM 985, KCl	Evaporite - unknown source	Chloride	National Bureau of Standards, obtained from Justin Simon, NASA
*run without K separation
** these samples are included in the bulk silicate earth calculation
*** 'N' here is defined as the number of sample-standard bracketing measurements
elsewhere, N is defined as the number of chemical separations, each of which is measured 2-3 times
samples with 'na' as standard error were only run one time (n=1). The long term reproducibility of 0.17 is provided as an appropriate value for standard deviation.

## Sheet: Table S2
Standard Name	Standard ID	d41K	± 1	N	SE	Category	Source	Phase	Setting and Locality	Na2O (wt%)	MgO (wt%)	Al2O3 (wt%)	K2O (wt%)	CaO (wt%)	TiO2 (wt%)	MnO (wt%)	Fe2O3 (wt%)
Centreville Diabase	W-2a	-0.547	0.107	2	0.076	Silicate	Magmatic	Whole rock	USGS Whole Rock powdered standard	2.275	6.187	15.45	0.649	11.805	0.896	0.189	11.998
Guano Valley Andesite	AGV-2	-0.56	0.053	5	0.024	Silicate	Magmatic	Whole rock	USGS Whole Rock powdered standard	4.208	1.759	17.015	2.823	4.789	0.836	0.099	6.566
Mica Schist	SDC-1	-0.656	0.068	2	0.048	Silicate	Metamorphic	Whole rock	USGS Whole Rock powdered standard	2.127	1.754	16.14	3.445	0.856	0.935	0.119	7.045
Quartz Latite	QLO-1	-0.584	0.071	4	0.07	Silicate	Magmatic	Whole rock	USGS Whole Rock powdered standard	4.258	1.008	16.295	3.653	2.838	0.527	0.091	4.169
Silver Plume Granodiorite	GSP-2	-0.48	0.053	3	0.031	Silicate	Magmatic	Whole rock	USGS Whole Rock powdered standard	2.875	0.96	14.9	5.836	2.12	0.675	0.042	5.164
Columbia River Basalt	BCR-2	-0.553	0.06	4	0.032	Silicate	Magmatic	Whole rock	USGS Whole Rock powdered standard	3.246	3.661	13.5	1.676	6.931	1.914	0.203	13.83
Hawaiian Basalt	BHVO-2	-0.518	0.12	2	0.084	Silicate	Magmatic	Whole rock	USGS Whole Rock powdered standard	2.358	7.552	13.5	0.571	12.567	2.905	0.182	13.54
Green River Shale	SGR-1b	-0.246	0.04	4	0.022	silicate	Sedimentary	Whole rock	USGS Whole Rock powdered standard	3.288	4.428	6.52	1.737	8.708	0.282	0.034	3.157
Brush Creek Shale	SBC-1	-0.607	0.06	5	0.026	Silicate	Sedimentary	Whole rock	USGS Whole Rock powdered standard	0.17	2.615	21	3.27	2.997	0.807	0.151	9.697

## Sheet: Table S3
Sample name	d41K	± 2s	Imbalance	Neptune Date
BSW	0.0132225	0.0339194	1.05309	2013-08-14
BSW	-0.0132225	0.0530915	1.04855	2013-08-14
bsw	0.0596636	0.0695339	1.05988	2013-08-16
BSWii	0.0734288	0.0879943	1.02206	2013-08-17
BSW15	0.0364001	0.0163957	1.07063	2014-01-23
BSW15	-0.0158701	0.075356	1.07467	2014-01-23
BSW15	0.0342642	0.0871942	1.06268	2014-01-23
BSW15	0.0894547	0.094158	1.09062	2014-01-23
BSW15_1	-0.00786805	0.0303092	1.04725	2014-01-26
10BSW RPT	0.00786805	0.0793961	1.06564	2014-01-26
8p_BSW-4_08-29_a	-0.0629084	0.011405	1.07179	2014-09-05
8p_BSW-3_08-29_a	0.00850869	0.0207469	1.05433	2014-09-05
8% BSW - 1 09/02	0.0738776	0.00550357	0.935871	2014-09-09
8p_BSW-2_09-04_a	-0.000703197	0.0339982	0.972561	2014-09-11
8perc_BSW-1_09-04_a	0.000703197	0.0847655	0.982176	2014-09-11
8perc_BSW-1_09-07_a	-0.0795252	0.0158848	0.980464	2014-09-12
8p_BSW-2_09-07_a	-0.00433505	0.0558632	1.0212	2014-09-12
8p_BSW-3_09-07_a	0.113251	0.09321	1.03224	2014-09-12
8p_BSW-4_09-07_a	-0.0293909	0.123918	1.06266	2014-09-12
8p_BSW-1_09-10_a	0.0698268	0.0152605	1.04046	2014-09-15
BSW1	-0.0229712	0.11702	0.947745	2015-05-10
2 BSW all	0.0129755	0.0825586	0.950989	2015-05-12
1 BSW all	-0.0129755	0.129072	0.949591	2015-05-12
BSW-1	0.107066	0.0931703	0.960159	2015-09-10
BSW-6_9-15	-0.0363028	0.00572562	1.01819	2015-09-21
BSW-8_9-15	0.0484562	0.00964002	1.08201	2015-09-21
BSW-10_9-15	0.0367732	0.018696	1.07	2015-09-21
BSW-7_9-15	-0.0489266	0.0984969	1.02131	2015-09-21
BSW-2_9-15	-0.0569781	0.0106535	0.949678	2015-09-23
BSW-1_9-15	-0.0336066	0.0129609	0.928007	2015-09-23
BSW-3_9-15	0.0068788	0.0484997	0.949666	2015-09-23
BSW-4_9-15	-0.030688	0.0741023	0.956987	2015-09-23
BSW-1_9-15	-0.0277234	0.00426068	0.955653	2015-09-24
BSW-1_9-15	-0.00694696	0.00889698	0.947249	2015-09-24
BSW-3_9-15	-0.0118249	0.0142999	0.957777	2015-09-24
BSW-2_9-15	-0.0630871	0.0159758	0.953431	2015-09-24
BSW-4_9-15	-0.0290625	0.0295698	0.950553	2015-09-24
BSW-2_9-14	0.0426547	0.0489272	0.978548	2015-09-24
BSW-5_9-15	0.0959902	0.116553	0.947287	2015-09-24
BSW-1_9-20	-0.0981716	0.00655909	0.952959	2015-09-26
BSW-2_9-18	-0.0225495	0.0274007	0.956695	2015-09-26
BSW-1_9-18	-0.00363624	0.0365332	0.960085	2015-09-26
BSW-2_9-20	0.124357	0.0806276	0.963894	2015-09-26
BSW-2_9-20	0.0577644	0.0131304	0.979173	2015-09-27
BSW-2_9-18	0.0470157	0.0396418	0.964412	2015-09-27
BSW-1_9-18	-0.000247951	0.093157	0.976133	2015-09-27
BSW-1_9-28a	-0.00511772	0.00967367	1.00397	2015-10-06
BSW-2_9-28	0.0446833	0.0193587	0.991361	2015-10-06
BSW-1_9-30	-0.0395656	0.0232041	0.988793	2015-10-06
BSW-1	-0.00468047	0.00228658	0.943279	2015-10-08
BSW-2_9-10	0.0503416	0.0277351	0.945134	2015-10-08
BSW-1_9-8	-0.0859143	0.0474944	0.950228	2015-10-08
BSW-2_9-8	-0.00514502	0.0513945	0.96037	2015-10-08
BSW-1_9-10	0.0453981	0.0544017	0.94809	2015-10-08
BSW-2_12-28-15	-0.0793443	0.0646075	0.901034	2016-07-07
BSW-5	0.0793443	0.107401	0.928428	2016-07-07
BSW-1_6-6-16	-0.0573745	0.00205003	0.994262	2016-07-08
BSW-3_6-6-16	0.176073	0.00790294	0.910486	2016-07-08
BSW-2_7-6-16	-0.0528795	0.120231	0.995673	2016-07-08
BSW-4_6-6-16	0.0629973	0.00143612	0.93229	2016-07-11
BSW-2_6-6-16	-0.174242	0.0331575	0.924756	2016-07-11
BSW-1_6-6-16	0.111245	0.105608	0.933312	2016-07-11
BSW-1_10-31-15	-0.0115712	0.0427771	0.989206	2016-07-12
BSW-1_11-2-15	0.0115712	0.0814974	0.935225	2016-07-12
BSW-1_11-2-15	0.0935669	0.0412398	1.02576	2016-07-14
BSW-1_12-22-15	0.000981822	0.0712228	0.979917	2016-07-18
BSW-1_7-13-16	-0.218233	0.104657	0.980746	2016-07-18
BSW-2_12-22-15	0.107617	0.129351	1.00766	2016-07-18
BSW-4_7-06B-16	-0.0327445	0.0250958	0.955843	2016-07-19
BSW-2_7-16-16	-0.0600853	0.0553771	0.947094	2016-07-19
BSW-K	0.0032868	0.109402	0.971226	2016-07-19
BSW-5_6-6-16	0.089543	0.113908	0.940307	2016-07-19
BSW-2_7-18-16	0.0259734	0.0360232	1.0327	2016-07-21
BSW-1_7-19-16	-0.0259734	0.114606	1.03834	2016-07-21
BSW-1_10-09-15	-0.0325548	0.062206	0.975199	2016-07-26
BSW-2_7-19-16	0.0325548	0.124969	0.977396	2016-07-26
BSW-1_7-20-16	0.0177799	0.0601758	0.957839	2016-07-27
BSW-1_7-25-16	-0.0359609	0.0715598	0.99286	2016-07-27
BSW-2_7-20-16	-0.103687	0.0791406	1.06609	2016-07-27
BSW-2_7-25-16	0.121868	0.101372	0.988533	2016-07-27
BSW-1_8-8-16	-0.0246589	0.0739509	0.993739	2016-08-13
BSW-2_8-8-16	0.0246589	0.0933523	1.01905	2016-08-13
BSW-1_8-11-16	-0.151417	0.0718881	1.03402	2016-08-15
BSW-2_8-11-16	0.151417	0.106077	1.00167	2016-08-15
BSW-1_8-13-16	-0.0691993	0.0388105	1.0081	2016-08-16
BSW-2_8-13-16	-0.019132	0.0874396	1.01038	2016-08-16
BSW-2_8-15-16	-0.241847	0.0134177	0.994783	2016-08-17
BSW-3_8-15-16	-0.24714	0.0477563	1.04005	2016-08-17
BSW-1_8-15-16	-0.31391	0.0714906	1.01957	2016-08-17
BSW-1_8-19b	-0.0511913	0.0556542	1.01507	2016-08-23
BSW-1_8-19	0.0337128	0.0882007	1.00726	2016-08-23
BSW-2_8-19	0.0174785	0.117937	0.997553	2016-08-23
BSW-1_8-16	-0.0648037	0.0411102	1.05739	2016-08-25
BSW-2_8-22-16	-0.207382	0.0774022	1.02704	2016-08-25
BSW-1_8-22	-0.129469	0.0933197	1.05599	2016-08-25
BSW-2_8-16-16	-0.204269	0.106292	1.01594	2016-08-25
BSW-2_8-9-16	-0.0219487	0.0674196	1.01545	2016-08-26
BSW-2_8-17-16	0.0219487	0.122941	1.03422	2016-08-26
BSW-1_8-23-16_2	-0.0340813	0.0121626	0.992047	2016-08-28
BSW-1_8-23-16	0.0340813	0.121479	0.988998	2016-08-28
BSW-2_8-29-16	-0.0200838	0.030766	1.01389	2016-08-30
BSW-1_8-29-16	0.0200838	0.113402	0.953489	2016-08-30
BSW-1_9-3-16	-0.0133555	0.087758	1.01653	2016-09-05
BSW-1_9-2-16	-0.0313087	0.108685	1.00039	2016-09-05
BSW-2_9-1-16	0.0446642	0.112236	0.996371	2016-09-05
BSW-2_8-30-16	-0.00986845	0.0779184	0.987885	2016-09-07
BSW-1_8-30-16	0.00986845	0.0944335	0.982675	2016-09-07
BSW-1_9-6-16	0	0.0351028	0.985354	2016-09-09

## Sheet: Table S4
Mg-dominated solution	% contaminant (Mg)	% contaminant (total)	δ41K	2σ	corrected δ41K
MATRIX 6%	6	14.55	-0.0660832	0.0474363	0.0596675
MATRIX 8%	8	19.4	-0.133977	0.0745282	-0.0082261
MATRIX 10%	10	24.25	-0.163517	0.0383133	-0.0377658
MATRIX 20%	20	48.5	-0.196226	0.0543712	-0.070475
OY	0		-0.125751	0.0569594
Solutions made using K from a different KNO3 solution, which has d41K -0.13 permil compared with SRM999b. Run values and corrected values are provided.
Impurities in Mg-dominated Solution:
X	X/Mg	X/K (%), 6%Mg soln.	X/K (%), 8%Mg soln.	X/K (%), 10%Mg soln.	X/K (%), 20%Mg soln.
Mg (MR)	1	6	8	10	20
Na	0.5	3	4	5	10
Mn	0.0833333	0.5	0.666667	0.833333	1.66667
Sr	0.00833333	0.05	0.0666667	0.0833333	0.166667
Ca	0.333333	2	2.66667	3.33333	6.66667
Fe	0.166667	1	1.33333	1.66667	3.33333
Al	0.333333	2	2.66667	3.33333	6.66667
Total	2.425	14.55	19.4	24.25	48.5
Ca-dominated solution	% contaminant (Ca)	% contaminant (total)	δ41K	2σ
	3.31	5.8472	0.027	0.052
	33.1	58.472	-0.638	0.067
Impurities in Ca-dominated Solution:
X	X/Ca	X/K (%), 5.8% Ca soln.	X/K (%), 58% Ca soln.
Ca	1	3.31	33.1
Na	0	0	0
Mg	0.0422961	0.14	1.4
Al	0.398792	1.32	13.2
Cr	0.0060423	0.02	0.2
Mn	0.00060423	0.002	0.02
Fe	0.0634441	0.21	2.1
Ni	0.000302115	0.001	0.01
Rb	0.253776	0.84	8.4
Sr	0.00060423	0.002	0.02
Ba	0.000302115	0.001	0.01
Nd	6.0423e-05	0.0002	0.002
Pb	0.000302115	0.001	0.01
Total	1.76653	5.8472	58.472
Processed samples and standards (examples)
	% contaminant (total)	δ41K	2σ
SRM999b, K separate	3.7567	0.026	0.043
SRM999b, K separate	0.533	0.022	0.058
BSW, K separate	7.75	0.073	0.088
BSW, K separate	4.61	0.06	0.07
whole rock silicate, K separate	0.7	*should not = 0 permil*
%X relative to K:
X	X/K (%) SRM 999b	X/K (%) SRM 999b	X/K (%) BSW	X/K (%) BSW	X/K (%) whole rock silicate
Na	0.0567	0.082	0.94	0.51	0.109
Mg	0.282	0.229	4.66	3.25	0.233
Al	n.d.	n.d.	n.d.	n.d.	n.d.
Ca	1.483	0.193	2.13	0.68	0.218
Cr	n.d.	n.d.	n.d.	n.d.	n.d.
Mn	0.01	0.009	0	0	0.008
Fe	1.925	0.02	0.02	0.07	0.132
Ni	n.d.	n.d.	n.d.	n.d.	n.d.
Rb	n.d.	n.d.	n.d.	n.d.	n.d.
Sr	0	0	0	0.1	0
Ba	n.d.	n.d.	n.d.	n.d.	n.d.
Nd	n.d.	n.d.	n.d.	n.d.	n.d.
Pb	n.d.	n.d.	n.d.	n.d.	n.d.
Total	3.7567	0.533	7.75	4.61	0.7
